# Supplementary material for: Diagnostic, Clinical and Post-SARS-CoV-2 Scenarios in Cancer Patients with SARS-CoV-2: Retrospective Analysis in Three German Cancer Centers
Source: MDPI journal article supplement (doi:10.3390/cancers13122917), 2021-06-11
Supplement: s1 [file s1]

**Table S1.** Clinical characteristics and outcomes in asymptomatic patients with SARS-CoV-2. MCL, mantle cell lymphoma; R/R, relapsed/progressive disease; PMBC, primary mediastinal B-cell lymphoma; PR, partial remission; MZL, marginal zone lymphoma; CR, complete remission; SD, stable disease; HDCT/ASCT, high-dose chemotherapy/autologous stem cell transplantation; T-LBL, T-cell lymphoblastic lymphoma; B-ALL, B-cell acute lymphoid leukemia; APL, acute promyelocytic leukemia; T-ALL, T-cell ALL; allo-SCT, allogeneic stem cell transplantation; PNH, paroxysmal nocturnal hemoglobinuria; CTX, chemotherapy.

| Patient №                    | Age | Cancer Type         | Comorbidities, № | Prior Lines of Therapy, № | Remission Status at SARS-CoV-2 Positivity | Cancer Therapy at SARS-CoV-2 Positivity        | Admission Following SARS-CoV-2 Positivity | Weeks From SARS-CoV-2 Positivity to Last FU | Status at last Follow-Up              |
|------------------------------|-----|---------------------|------------------|---------------------------|-------------------------------------------|------------------------------------------------|-------------------------------------------|---------------------------------------------|---------------------------------------|
| <i>Hematologic neoplasms</i> |     |                     |                  |                           |                                           |                                                |                                           |                                             |                                       |
| <i>Lymphomas</i>             |     |                     |                  |                           |                                           |                                                |                                           |                                             |                                       |
| 1                            | 66  | MCL                 | 3                | 2                         | R/R                                       | rituximab/bendamustine/<br>cytarabine          | admission before<br>SARS-CoV-2            | 5                                           | death in R/R under ib-<br>rutinib     |
| 2                            | 21  | PMBC                | 0                | 1                         | PR                                        | aftercare following R-CHOEP<br>and radiation   | no                                        | 5                                           | alive in PR,<br>aftercare             |
| 3                            | 85  | MZL                 | 2                | 1                         | PR                                        | rituximab/bendamustine                         | no                                        | 4                                           | alive in CR,<br>ongoing<br>immuno-CTX |
| 4                            | 81  | DLBCL               | 3                | 5                         | R/R                                       | rituximab/bendamustine/<br>polatuzumab vedotin | no                                        | 35                                          | alive in CR,<br>aftercare             |
| 5                            | 36  | Hodgkin<br>lymphoma | 0                | 2                         | SD                                        | HDCT/ASCT                                      | admission before<br>SARS-CoV-2            | 6                                           | alive in PR,<br>aftercare             |
| 6                            | 61  | MCL                 | 0                | 1                         | R/R                                       | aftercare in progress                          | admission before<br>SARS-CoV-2            | 11                                          | alive in R/R,<br>under ibrutinib      |

|                                |    |                       |   |   |     |                                              |                                |    |                                    |
|--------------------------------|----|-----------------------|---|---|-----|----------------------------------------------|--------------------------------|----|------------------------------------|
| 7                              | 34 | T-LBL                 | 1 | 1 | CR  | aftercare following GMALL<br>08/2013         | no                             | 6  | alive in CR,<br>aftercare          |
| <i>Acute leukemias</i>         |    |                       |   |   |     |                                              |                                |    |                                    |
| 8                              | 59 | B-ALL                 | 1 | 2 | CR  | maintenance, GMALL<br>08/2013                | no                             | 13 | alive in CR,<br>aftercare          |
| 9                              | 73 | APL                   | 3 | 1 | CR  | arsenic trioxide/<br>all-trans retinoic acid | no                             | 9  | alive in CR,<br>ongoing therapy    |
| 10                             | 21 | T-ALL                 | 0 | 1 | CR  | induction, GMALL 08/2013                     | no                             | 15 | alive in CR,<br>post-allo-SCT      |
| <i>Others</i>                  |    |                       |   |   |     |                                              |                                |    |                                    |
| 11                             | 71 | Multiple<br>myeloma   | 4 | 1 | PR  | dexamethasone/<br>lenalidomide               | No                             | 4  | alive in PR,<br>ongoing therapy    |
| 12                             | 36 | PNH with<br>pregnancy | 0 | 1 | SD  | eculizumab                                   | admission for ob-<br>servation | 5  | alive, stable<br>PNH and pregnancy |
| <i>Solid neoplasms</i>         |    |                       |   |   |     |                                              |                                |    |                                    |
| <i>Gastrointestinal cancer</i> |    |                       |   |   |     |                                              |                                |    |                                    |
| 13                             | 62 | Liver can-<br>cer     | 4 | 1 | SD  | surgery                                      | admission before<br>SARS-CoV-2 | 22 | alive in PR,<br>post-CTX           |
| 14                             | 62 | Liver can-<br>cer     | 2 | 2 | R/R | gemcitabine/<br>cisplatin                    | admission before<br>SARS-CoV-2 | 7  | alive in R/R,<br>ongoing CTX       |
| 15                             | 66 | Pancreatic<br>cancer  | 2 | 1 | SD  | FOLFIRINOX                                   | no                             | 8  | alive in SD,<br>ongoing CTX        |
| 16                             | 69 | Colon can-<br>cer     | 1 | 2 | SD  | 5-fluorouracil/<br>bevacizumab               | no                             | 9  | alive in R/R,<br>change to FOLFOX  |
| <i>Sarcomas</i>                |    |                       |   |   |     |                                              |                                |    |                                    |
| 17                             | 42 | Sarcoma               | 0 | 3 | PR  | dacarbazine/L19TNF-PH-<br>L19TNFSARC-08/18   | no                             | 5  | alive in R/R,<br>ongoing CTX       |

|               |    |                    |   |   |     |                              |                                |    |                                     |
|---------------|----|--------------------|---|---|-----|------------------------------|--------------------------------|----|-------------------------------------|
| 18            | 19 | Sarcoma            | 0 | 1 | SD  | doxorubicin/Ifosfamide       | admission for ob-<br>servation | 2  | alive in SD, CTX restart<br>planned |
| <i>Others</i> |    |                    |   |   |     |                              |                                |    |                                     |
| 19            | 75 | Breast can-<br>cer | 2 | 7 | R/R | faslodex/letrozol            | no                             | 13 | alive in R/R,<br>palliative care    |
| 20            | 64 | Lung Can-<br>cer   | 1 | 2 | PR  | pemetrexed/<br>pembrolizumab | no                             | 4  | alive in CR,<br>aftercare           |

**Table S2.** Comparison of asymptomatic and symptomatic SARS-CoV-2 patients with hematologic malignancies. CR, complete remission; PR, partial remission; SD, stable disease; PD, progressive disease.

| Categories                                                                    | COVID-19 Patients with Hematologic Malignancies<br>( <i>n</i> = 20)                                                                                                                                                                           | Asymptomatic SARS-CoV-2 Patients with Hematologic<br>Malignancies ( <i>n</i> = 12)                          |
|-------------------------------------------------------------------------------|-----------------------------------------------------------------------------------------------------------------------------------------------------------------------------------------------------------------------------------------------|-------------------------------------------------------------------------------------------------------------|
| Entities, %                                                                   | B-lymphoid neoplasms 90%<br>myeloid neoplasms 10%                                                                                                                                                                                             | B-lymphoid neoplasms 84%<br>myeloid neoplasms 16%                                                           |
| Age, median (range)                                                           | 65 (27–82)                                                                                                                                                                                                                                    | 59 (21–81)                                                                                                  |
| Gender, male:female (%)                                                       | 60%:40%                                                                                                                                                                                                                                       | 50%:50%                                                                                                     |
| Co-morbidities, number, median<br>(range)                                     | 2 (0–3)                                                                                                                                                                                                                                       | 1 (0–4)                                                                                                     |
| Remission status at SARS-CoV-2 diag-<br>nosis                                 | CR 35%<br>PR 10%<br>SD 10%<br>relapsed/PD 30%<br>not assessed yet 15%                                                                                                                                                                         | CR 33%<br>PR 25%<br>SD 17%<br>relapsed/PD 25%                                                               |
| Days from last cancer treatment to<br>SARS-CoV-2 diagnosis, median<br>(range) | 22 (0–904)                                                                                                                                                                                                                                    | 11 (1–199)                                                                                                  |
| Therapy lines, number, median<br>(range)                                      | 2 (0–5)                                                                                                                                                                                                                                       | 1 (1–5)                                                                                                     |
| Cancer therapy at diagnosis of SARS-<br>CoV-2 (%)                             | follow-up surveillance 15%<br>conventional chemotherapy 20%<br>immunotherapy 45%:<br>- with chemotherapy 25%<br>- immunotherapy alone 15%<br>- with radiotherapy 5%<br>targeted therapy 10%<br>radiotherapy 5%<br>no therapy yet (planned) 5% | follow-up surveillance 25%<br>conventional chemotherapy 50%<br>immunotherapy combined with chemotherapy 25% |
